# Supplementary material for: Quantifying black carbon emissions from traffic and construction in central London using eddy covariance
Source: Royal Society of Chemistry journal article supplement (doi:10.1039/d5ea00039d), 2025-01-01
Supplement: d5ea00039d1.pdf [file d5ea00039d1.pdf]

## Supplement materials of

### **Quantifying Black Carbon emissions from Traffic and Construction in central London using Eddy Covariance**

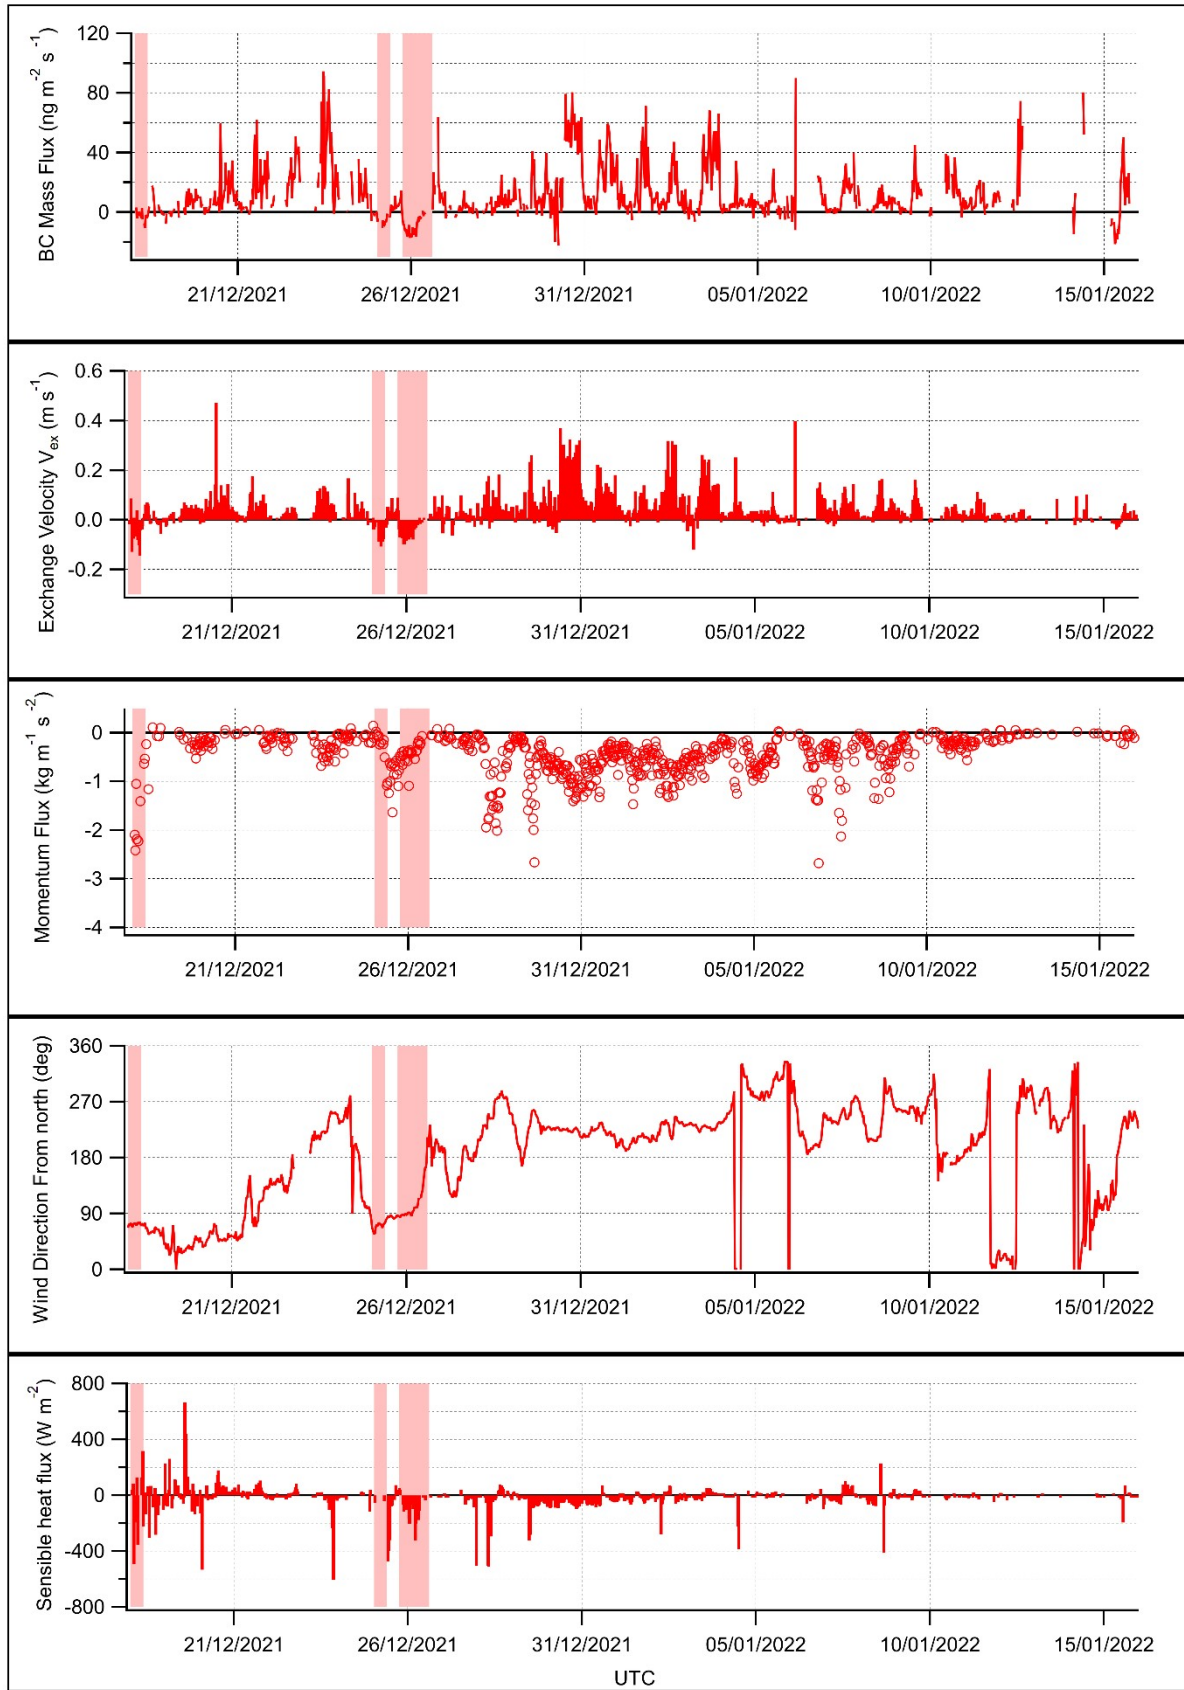

**Figure S1: Time series of BC mass flux, exchange velocity, momentum flux, wind direction, sensible heat flux for winter campaign with negative fluxes periods included and highlighted with red shaded.**

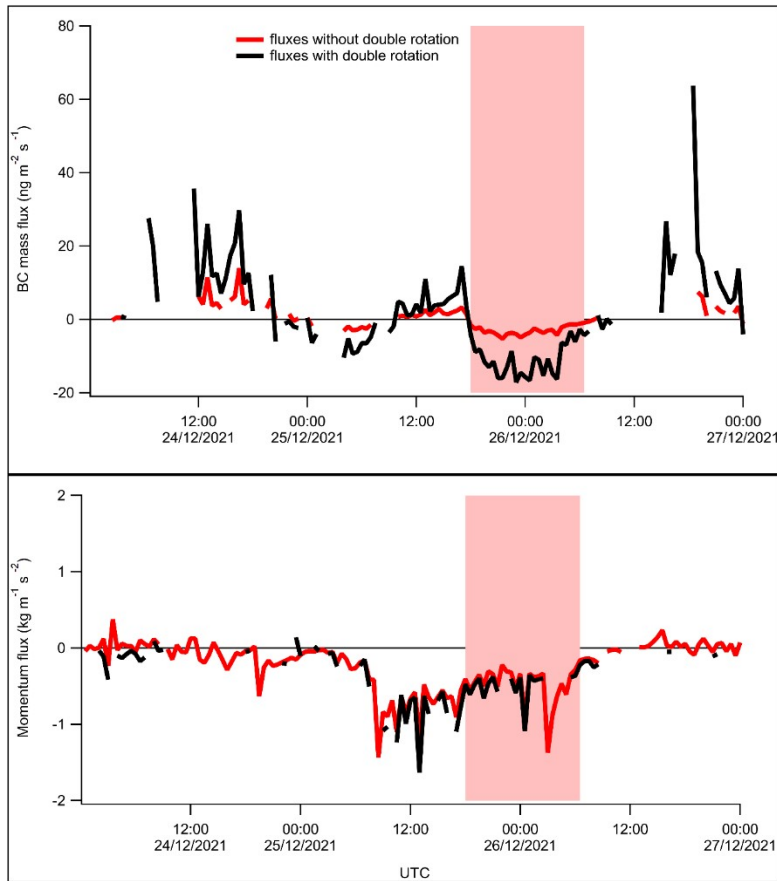

**Figure S2: BC fluxes and momentum fluxes including negative flux period (2024/12/24 00:00 – 2024 12/27 00:00) with double rotations applied (black) and not applied (red).**

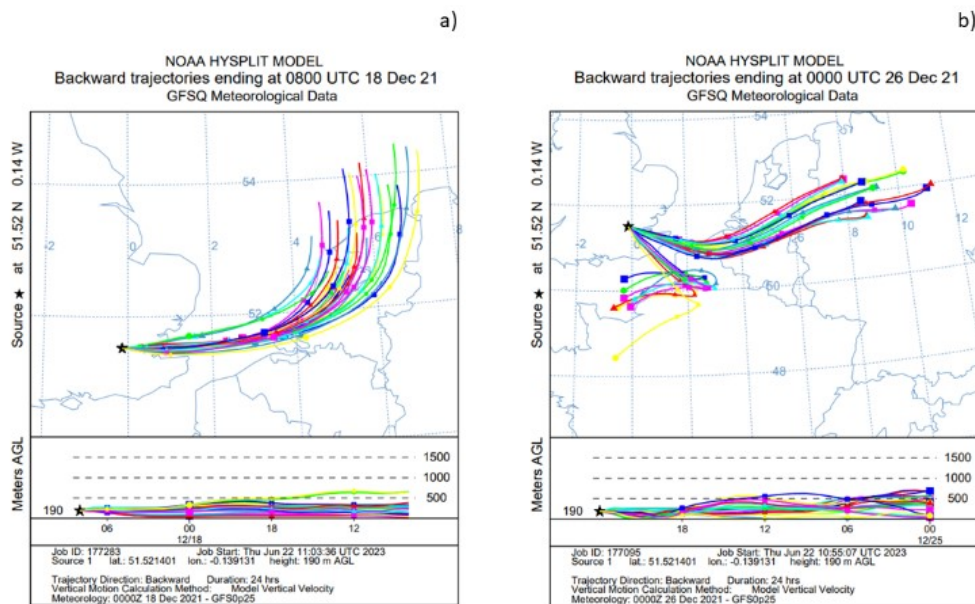

**Figure S3: NOAA HYSPLIT historic back trajectories (generated from website version) in negative flux periods. a) first negative fluxes period (2021/12/18 0:30 – 2021/12/18 9:00) and b) second and third negative fluxes periods (2021/12/24 18:00 – 2021/12/25 8:00 and 2021/12/25 18:00 – 2021/12/26 7:00)**

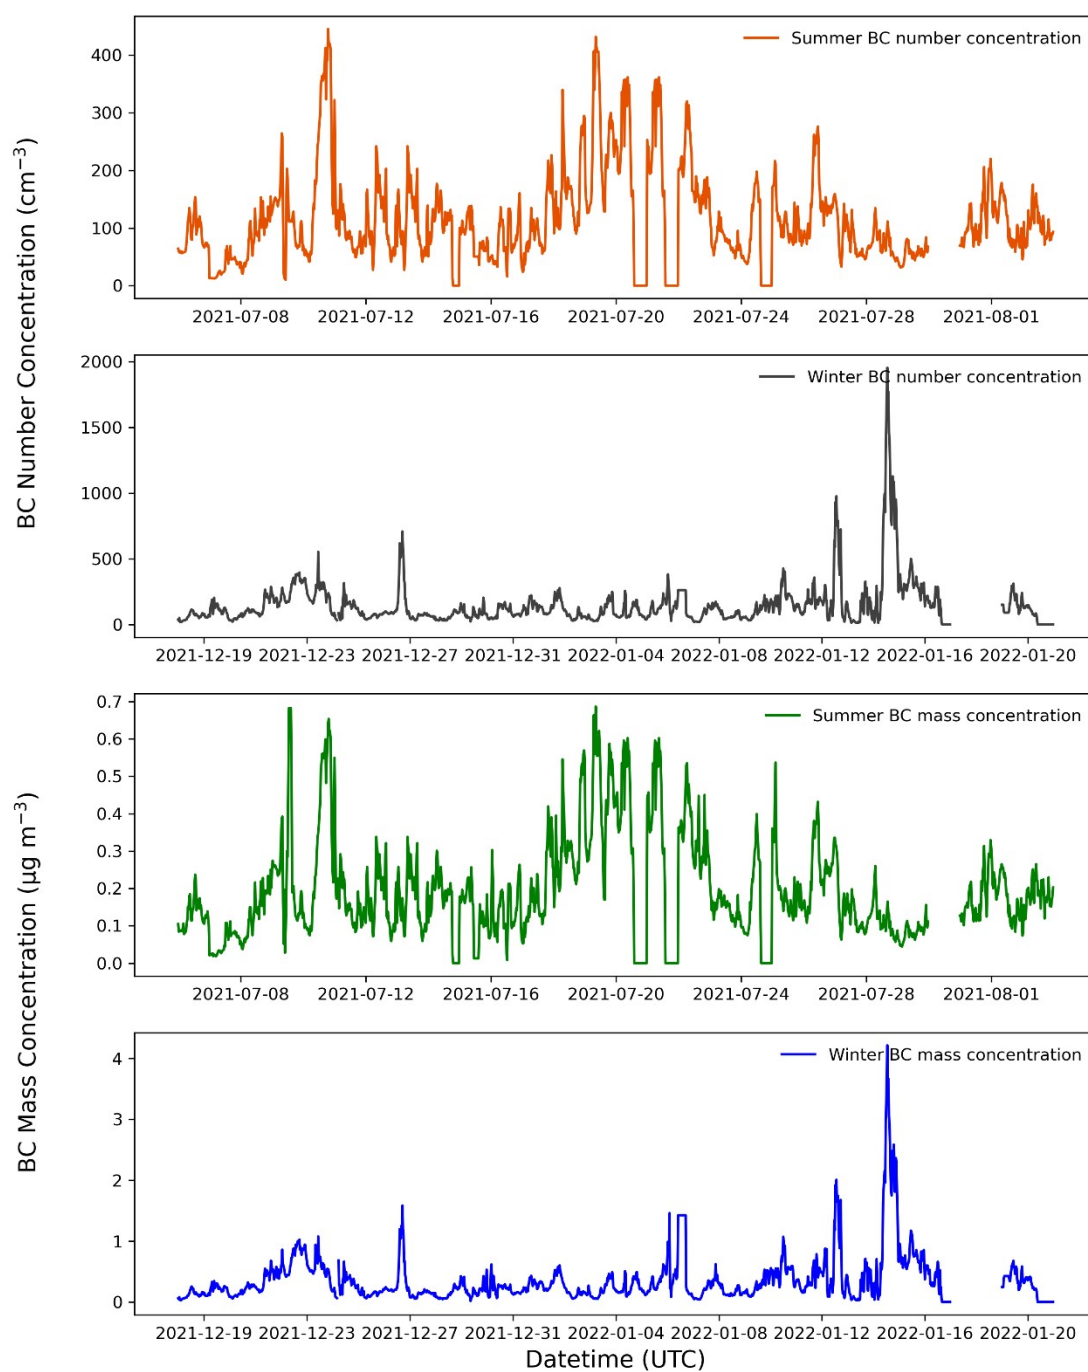

**Figure S4: Time series for BC mass and number concentrations in winter and summer.**

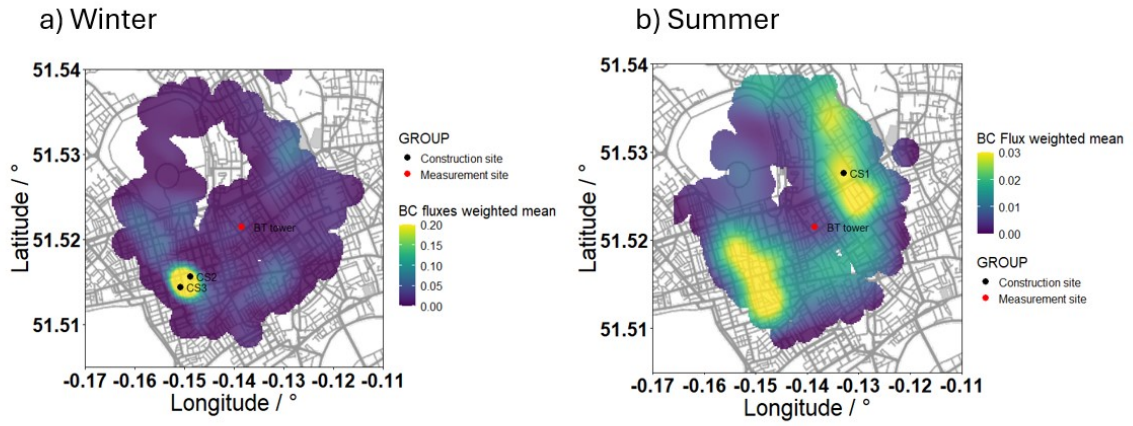

**Figure S5:** Spatial map for BC fluxes weighted mean for a) winter and b) summer. Here, weighted mean can provide the indication of flux  $\times$  frequency of occurrence, which highlights the flux footprint distance and direction that dominate the overall mean.

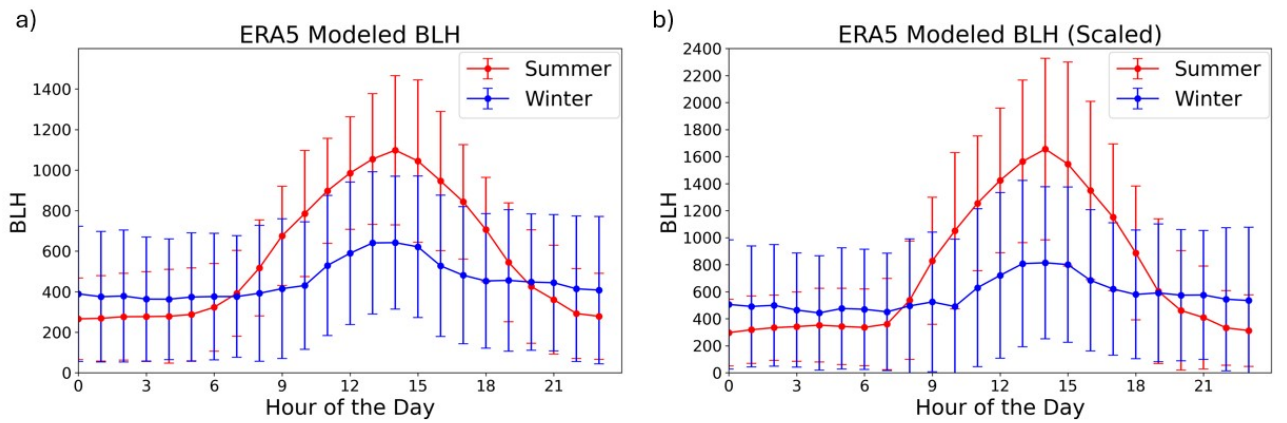

**Figure S6:** Boundary layer height (BLH) diurnal profiles during both BT tower campaign calculated from ERA5 (a) and applied correction factor <sup>1</sup>(b).



## a) Winter

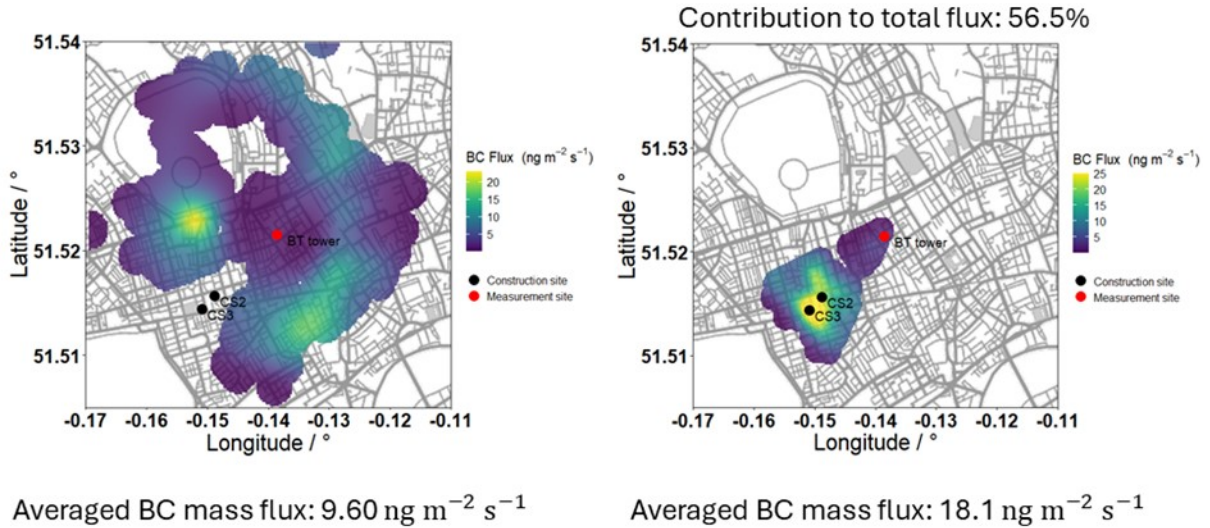

$$\frac{BC_{sw}}{BC_{Other}} \approx \frac{Construction}{Traffic} = 1.89$$

## b) Summer

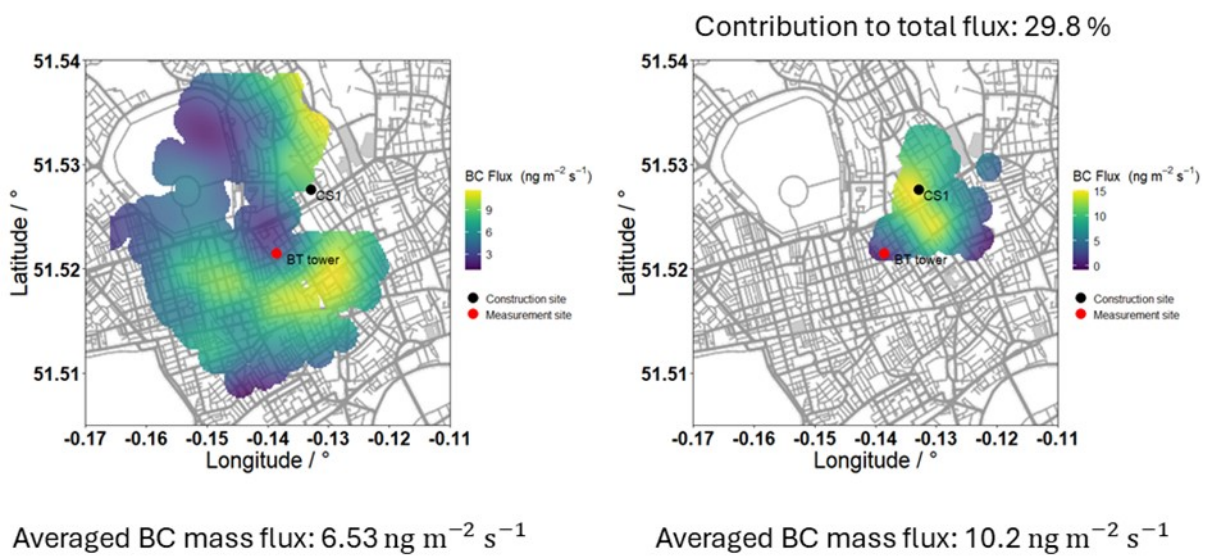

$$\frac{BC_{sw}}{BC_{Other}} \approx \frac{Construction}{Traffic} = 1.56$$

**Figure S7 BC flux footprint separated non-hotspot area and hotspot area in winter (a) and summer (b). In winter there is another hotspot area to the west of BT tower with BC flux larger than  $20 \text{ ng m}^{-2} \text{ s}^{-1}$  which is also identified as construction site but not document is found in West minster city council.**

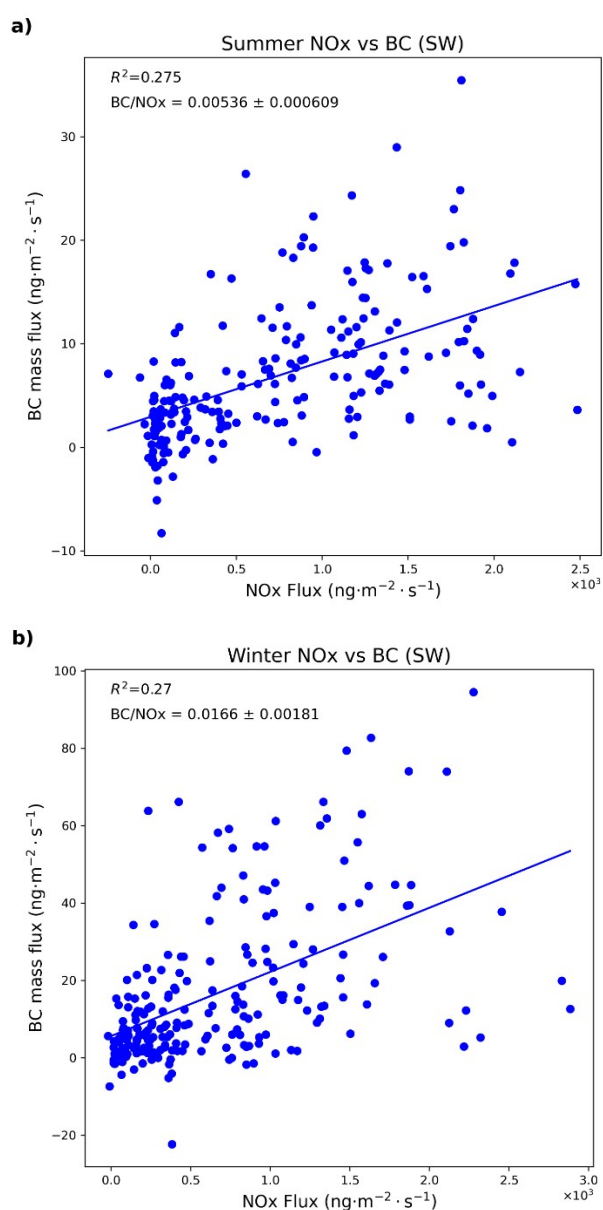

**Figure S8 Scatter plots for NOx vs BC to Southwest BT tower in summer (a) and winter (b)**

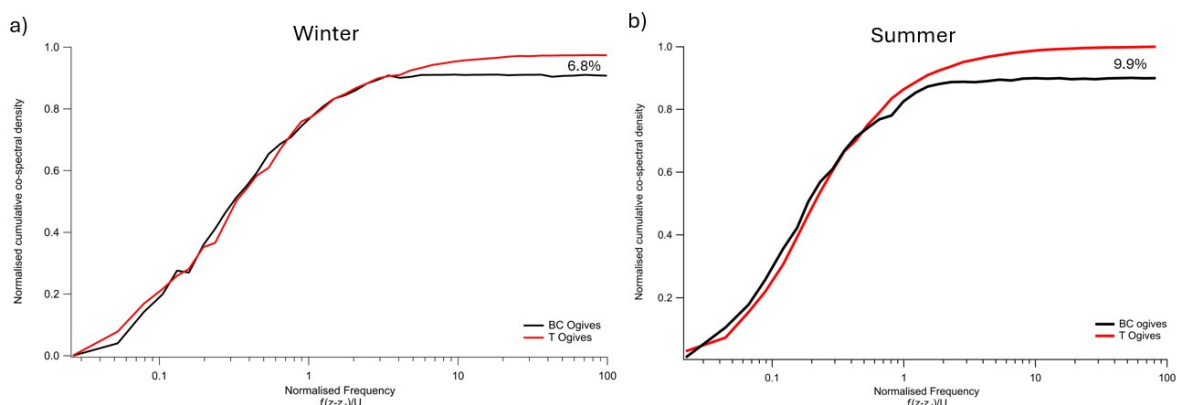

**Figure S9 Scaled Ogives for a) winter and b) summer spectral analysis. a) Winter is scaled using factor 0.96 resulting 6.8% flux losses. b) Summer is scaled using factor 0.90 resulting 9.9% flux losses.**

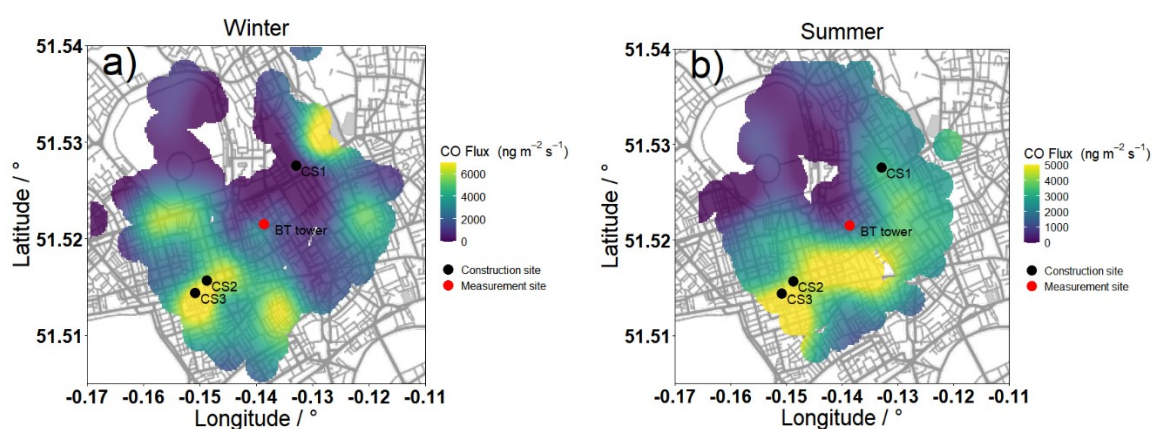

**Figure S10 Footprint spatial map for CO fluxes during winter (a) and summer (b) campaign**

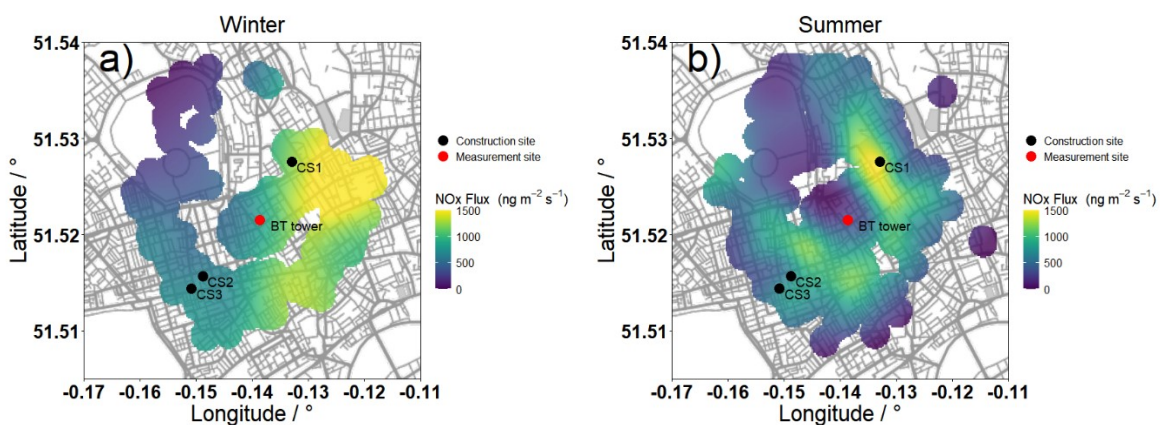

**Figure S11 Footprint spatial map for NOx fluxes during winter (a) and summer (b) campaign. Long term NOx fluxes are reported previously<sup>2</sup>.**

## References

1. W. S. Drysdale, A. R. Vaughan, F. A. Squires, S. J. Cliff, S. Metzger, D. Durden, N. Pingintha-Durden, C. Helfter, E. Nemitz, C. S. B. Grimmond, J. Barlow, S. Beevers, G. Stewart, D. Dajnak, R. M. Purvis and



- J. D. Lee, Eddy covariance measurements highlight sources of nitrogen oxide emissions missing from inventories for central London, *Atmospheric Chemistry and Physics*, 2022, **22**, 9413-9433.
2. S. J. Cliff, W. Drysdale, J. D. Lee, C. Helfter, E. Nemitz, S. Metzger and J. F. Barlow, Pandemic restrictions in 2020 highlight the significance of non-road NO<sub>x</sub> sources in central London, *Atmospheric Chemistry and Physics*, 2023, **23**, 2315-2330.
